# Supplementary material
Source: ML conference proceedings conference paper supplement (https://aclanthology.org/W17-5110)
Supplement: Attachment [file W17-5110.Attachment.zip]

# Supplementary material for Unsupervised corpus-wide claim detection

## Contents

|                                                                           |   |
|---------------------------------------------------------------------------|---|
| Supplementary material for Unsupervised corpus-wide claim detection ..... | 1 |
| 1. Sentence level index – technical details.....                          | 2 |
| 2. Query matches – summary .....                                          | 3 |
| 3. Annotation guidelines .....                                            | 4 |
| 4. Analysis of different claim lexicons .....                             | 5 |
| 5. Example output .....                                                   | 6 |
| 6. Claim lexicon.....                                                     | 7 |
| 7. Query matches – per topic .....                                        | 9 |

## *1. Sentence level index – technical details*

We processed the Wikipedia dump from May 18<sup>th</sup>, 2015. We applied text cleaning and sentence splitting using OpenNlp Sentence Detector [1] and then used the TagMe tool [2] to wikify each sentence, limiting the context used by TagMe for disambiguation to the surrounding sentence. Starting from 4.9M articles, the sentence level index contains 83M sentences.

For efficient selection of the required information, we kept in an inverted index (Apache Lucene4) [3] each Wikipedia sentence in a separate document unit. The surface form of the sentence and the Wikified concepts belonging to this sentence were indexed in dedicated fields. To allow precise span queries, we indexed, in addition, the position and the tokens length of the concepts. Our implementation followed the description in [4]. We define a query item to be either a single word, a conjunction of several words, or a Wikipedia concept. These query items are respectively translated to simple term constraints, Boolean constraints and fielded constraints. The final query is then built from an ordered list of query items. For a sentence to match the query, all items must appear in the sentence in the same order as in the query. Expressing the ordered constraint was obtained by using the LuceneSpanNearQuery with no slop limitation and expressing constraints mixing surface form and Wikified concept was obtained by using SpanFieldMaskingQuery which allows to project the Wikified concept constraint into the surface text space.

[1] OpenNlp - <https://opennlp.apache.org/>

[2] TagMe - Paolo Ferragina and Ugo Scaiella. 2010. Tagme: on-the-fly annotation of short text fragments (by wikipedia entities). In Proceedings of the 19th ACM international conference on Information and knowledge management. ACM, pages 1625–1628

[3] Lucene - <https://lucene.apache.org/>

[4] Indexing tagged data with lucene - <http://shaierera.blogspot.com/2016/01/indexing-tagged-data-with-lucene.html>

## 2. Query matches – summary

The tables below summarize the number of query matches for the development and test sets. Reporting average, standard deviation and median across all motions in the set. A detailed list of all topics in the sets along with their respective query matches are reported at the end of this document. Note that the numbers in the table are computed after removing sentences with the newline character and sentences of length smaller than 5 or larger than 50 (we removed these sentences in our experiments as well).

|        |                       |          |             |
|--------|-----------------------|----------|-------------|
|        | development set - 100 |          |             |
|        | #MC                   | #that+MC | #that+MC+CL |
| Mean   | 18607.1               | 1834.1   | 304.5       |
| Stdev  | 34390.0               | 3557.5   | 650.1       |
| Median | 4872.5                | 493.5    | 74.5        |
|        |                       |          |             |
|        |                       |          |             |
|        | test set - 50         |          |             |
|        | #MC                   | #that+MC | #that+MC+CL |
| Mean   | 9543.4                | 1121.6   | 205.1       |
| Stdev  | 19286.9               | 2342.3   | 377.8       |
| Median | 3899.0                | 467.5    | 78.0        |

### 3. Annotation guidelines

Guideline used for annotating the top 50 claim predictions. Annotation was done by 10-15 crowd workers per row via the CrowdFlower platform (<https://www.crowdflower.com/>).

#### Assessing the value of potential claims

In this task you are given a topic and possibly-related statements, each marked within a particular sentence.

For each candidate, you should select **"Accept"**, if you think that the marked statement can be used "as is" during discourse, to directly support or contest the given topic. Otherwise, you should select **"Reject"**.

If you selected "Accept", you should further indicate whether the marked text supports the topic ("Pro") or contests it ("Con").

Note, that if the marked text is non-coherent, hence cannot be used "as is" during a discussion about the topic, you should select "Reject".

Similarly, if the marked text supports/contests a *different* topic, even if it is somewhat related to the examined topic, you should typically select "Reject".

As a rule of thumb, if it is natural to say "I (don't) think that <topic>, because <marked statement>", then you should probably select "Accept". Otherwise, you should probably select "Reject".

Finally, if you are unfamiliar with the examined topic, please briefly read about it in a relevant data source like Wikipedia.

#### Examples for the topic "We should ban the sale of violent video games to minors" –

1. "The researchers found that **adolescents that play violent video games are most at-risk for violent behavior** (but without statistical significance)." -- **Accept / Pro**.
2. "Previous reports suggested that **kids playing Doom are not at a greater risk for violent behavior.**" -- **Accept / Con**.
3. "The researchers **found that adolescents that play violent video games are at no risk for violent behavior.**" -- **Reject**. Due to the prefix "found that", the marked text is not coherent and cannot be used "as is" while discussing the topic.
4. "**While violent video games are often associated with aggressive behavior**, recent studies are starting to suggest otherwise." -- **Reject**. Due to the prefix "While", the marked text is not coherent and cannot be used "as is" while discussing the topic.
5. "Many people believe that **some TV shows increase youth violence.**" -- **Reject**. The marked text is not *directly* supporting/contesting the topic.

#### 4. Analysis of different claim lexicons

As mentioned in the paper, q1-set (the set of sentences that match the query q1=MC) is divided into two classes - consisting of those sentences that contain the token 'that' before the MC, and those that do not; we denote these two classes as c1 and c2, respectively.

Given the weakly positive set (c1) and weakly negative set (c2), one can think of several ways to create a lexicon of words indicative of class c1. Probably the most straightforward option is to count, for each word w in the vocabulary, the number of sentences from c1/c2 in which w appears. The higher the ratio between  $P(c1|w)$  and  $P(c1)$  the more we are certain that word w is indicative of the class c1. We call this lexicon the full sentence lexicon (FSL).

However, the sentences in c1 and c2 are not just random sentences, both contain the MC for the 100 dev-set topics and the sentences in c1 all contain the word 'that' before a match of the MC. The matches of 'that' and 'MC' split the sentences in c1 into 3 parts – the prefix (all words before 'that'), the middle (all words between 'that' and the following MC) and the suffix (all words after the first MC that follows 'that'). It is possible that focusing on the different sentence parts will yield better lexicons. The prefix, middle and suffix lexicons are called PL, ML and SL respectively. For each lexicon, we created a claim sentence query and annotated a sample of the matching sentences in order to estimate the prior probability of the sentence to contain a claim. The annotation set was created by randomly selecting at most 3 sentences that match the query per topic in our dev-set, and annotating the resulting sentences by 5 human annotators.

The table below reports the estimated prior probability for each lexicon/query (we add the queries MC and that->MC for comparison). As mentioned in the paper the suffix lexicon (later denoted simply as the claim lexicon, or CL) was most promising for constructing the CSQ.

| Lexicon | Query                | Prior Estimation |
|---------|----------------------|------------------|
|         | MC                   | 0.024            |
|         | that -> MC           | 0.048            |
| FSL     | (that -> MC) AND FSL | 0.043            |
| PL      | PL -> that -> MC     | 0.047            |
| ML      | that -> ML -> MC     | 0.045            |
| SL      | that -> MC -> SL     | 0.098            |

## 5. Example output

The following table shows the top 10 predictions for the topic "Social media does more harm than good". The precision at 10 of the chosen topic is 0.4 (compared to the test set average 0.3 and median 0.25). The predicted claims are marked in bold in the respective sentences. The last two columns report the number of annotators who chose to accept or reject the predicted claim.

| Rank | Sentence                                                                                                                                                                                                                                                                                                         | Label  | #Accept | #Reject |
|------|------------------------------------------------------------------------------------------------------------------------------------------------------------------------------------------------------------------------------------------------------------------------------------------------------------------|--------|---------|---------|
| 1    | BPI asserts that <b>social media and ABC News "grossly misrepresented" their product [REF].</b>                                                                                                                                                                                                                  | Accept | 8       | 7       |
| 2    | Opponents to this theory also argue that <b>economic regulation of social media sites could decrease investment, and consequently harm customers and rivals.</b>                                                                                                                                                 | Reject | 3       | 12      |
| 3    | In a blog post, he stated that <b>social media has "become an unhealthy part of my life and a danger to the personal relationship I have with my work."</b>                                                                                                                                                      | Accept | 13      | 2       |
| 4    | Although the name was changed the creator of the show researched what happened to Sunil and based the episode around the legal ramifications that <b>social media sites potentially face as a result of false information being disseminated.</b>                                                                | Reject | 9       | 5       |
| 5    | It judged that <b>online activism, particularly in social media, could cause a rise in xenophobia, and that this in turn could lead to polarization within and between extreme political movements.</b>                                                                                                          | Accept | 13      | 2       |
| 6    | Regarding Twitter, he stated that <b>"For all its trendiness, social media is often a waste of their time." [REF] .</b>                                                                                                                                                                                          | Accept | 12      | 3       |
| 7    | In his article, "Why Music Won't Be Saved By Social Media", Wes Davenport suggests that <b>the role of social media in the industry "has been grossly inflated".</b>                                                                                                                                             | Reject | 5       | 10      |
| 8    | Opponents point out that <b>because social media is constantly evolving, innovation and competition are necessary for its growth.</b>                                                                                                                                                                            | Reject | 2       | 13      |
| 9    | Opponents to this theory believe that <b>imposing utility status on social media websites would consequently cause government regulation, which could result in an unfair change for both businesses and individuals.</b>                                                                                        | Reject | 2       | 13      |
| 10   | Writing in The Week, Ryan Cooper called the harassment campaign "an online form of terrorism" intended to reverse a trend in gaming culture toward increasing acceptance of women, and stated that <b>social media platforms need to tighten their policies and protections against threats and abuse [REF].</b> | Reject | 4       | 11      |

## 6. *Claim lexicon*

The claim lexicon sorted by importance:

should, tuned, could, unconstitutional, violate, might, violated, violates, wrong, rather, valid, invalid, irrelevant, inherently, necessarily, cannot, prevail, justify, flawed, merely, corpus, ought, inevitably, cause, justifiable, unacceptable, untrue, abhorrent, unless, harmful, punished, liable, incompatible, beneficial, justifying, undecided, skimmed, indefensible, impossible, undermine, necessary, flourish, meaningless, outweigh, substantiated, refute, jeopardized, incapable, irrational, heterosexual, immoral, tipped, preferable, deterred, wipe, intrinsically, ascending, deserved, enveloped, unduly, anyway, warranted, foreseeable, sure, justified, feasible, consummated, else, meaningful, fundamentally, falsifiable, inconsistent, brute, testable, equally, properly, actually, happen, unfounded, infringed, result, likely, safeguarded, irreversible, destroy, nor, outweighed, unnecessary, dared, legitimate, insignificant, unjustly, unprotected, empirically, acceptable, untenable, constitute, unrealistic, disappear, sooner, unlikely, negligible, retaliatory, needed, faked, misleading, contaminated, fail, socioeconomic, conclusive, undemocratic, deserve, improperly, inevitable, insult, breached, harm, whatsoever, rehired, safer, liberate, overboard, unsound, healthier, mandate, mutually, rationally, stifled, false, unconstitutionally, somehow, LGBTQ, unjust, ridiculous, really, otherwise, causal, legitimately, incorrect, prejudiced, explode, hers, discernible, manipulated, perpetrated, tolerated, lucid, wo, reliably, coercive, desirable, impotent, irresistible, unambiguous, misinterpreted, contradict, detrimental, reasonably, unchanged, too, misrepresented, catastrophic, rogue, ruining, benefit, manipulating, solve, correlate, constitutionally, bigotry, verifiable, obsolete, differently, happening, ethiopian, selfish, unethical, undermines, dangerous, ineffective, endanger, refuted, unproven, shall, dogmatic, ontological, logical, rightful, undermined, abuse, perpetuate, exaggerated, moral, permissible, ridicule, sincerely, sane, subdue, unfairly, inaccurate, discriminatory, erroneous, waste, distract, desire, decreases, insufficient, compelling, destabilize, sexist, morally, absurd, emotional, predicated, overdose, biologically, retracted, distort, adequately, do, intimidated, surely, absolutely, worse, infinite, terrorist, underdeveloped, ourselves, worth, materially, biased, psychologically, unsubstantiated, differentiated, complied, inappropriately, inseparable, ruin, constitutes, disclose, unnatural, poisoning, slitting, invalidated, contradictory, unlawful, corrupted, overdosing, contrary, correct, swallowing, prove, await, intolerable, credible, interfered, anymore, simply, militarily, inflict, disagree, unreliable, unhealthy, perfectly, forever, manipulate, inconclusive, contradicts, arouse, unsafe, despondent, dismisses, sinful, trafficked, succeed, deleted, harmless, trillion, tantamount, us, satisfactory, behave, mortal, copyrighted, harming, atheistic, wage, unwarranted, inferior, reasonable, hardly, fit, appreciate, suit, lawful, unjustified, appropriate, exceeded, futile, infringe, arbitrarily, grossly, conceal, amount, bypassing, decrease, xenophobic, confuse, darwinian, contradicting, revert, disrupt, statistically, desired, disappears, anabolic, incite, diminish, falsified, compatible, weaken, reduces, sufficient, mean, earthly, undesirable, distorted, miss, appropriately, inappropriate, satanic, emitted, flowed, ineligible, outdated, damned, proscribed, materialistic, precisely, affect, mitigating,

solved, supernatural, entail, delete, evolve, trigger, uncomfortable, homosexual, reckless, lawfully, humane, cohabiting, rested, anticipate, eroded, implanted, excessively, therapeutic, bible, conveying, repay, altogether, oppressive, grounded, conform, mere, enslaved, impartial, collapse, reversing, unsure, whichever, sleep, theirs, outright, construed, sinister, artificially, null, pretend, compulsive, unscientific, viable, disparate, fear, invariably, individualistic, implying, correlated, grasp, prematurely, stupid, somewhere, discriminated, pretty, capitalist, accountable, monotheistic, inhumane, predetermined, compel, utterly, wiped, doctrinal, akin, damage, indirect, weaker, legitimize, compliant, misguided, accurate, innocent, flourishing, heal, monogamous, intervene, wrongly, conquer, doomed, imperialist, barred, boost, improves, subjective, accounting, virtuous, poisoned, excited, abnormal, experiential, verified, absolute, depend, wait, ascetic, insofar, need, escalate, eternal, deserves, modify, opposite, aggregate, inefficient, corrected, orderly, emerge, rendering, worldly, regretted, underrepresented, individually, overly, pluralistic, unreasonable, substantive, exacerbated, seem, deprive, irresponsible, yielding, divert, impact, decreasing, inherit, societal, poorer, stimulating, deter, delaying, bogus, confess, inhibit, overthrow, bipolar, adequate, interfere, disproportionate, worry, existent, indispensable, contacting, impede, negatively, imminent, abrupt, uneducated, rest, thereby, divine, coincide, involuntary, psychological, risk, compromising, exploitative, genetically, interstate, replicate, emerges, therefore, sic, mind, underprivileged, genuine, tailored, lacks, pornographic, exclude, apprehended, logically, incomplete, must, guaranteed, ignored, observational, vested, epistemological, vain, verify, impaired, genetic, curtailed, hanging, endure, ca, diminished, blame, nonviolent, questionable, bolster, discounted, reinforcing, leaping, naive, satisfying, obscene, subordinated, analogous, drinking, entails, inadequate, sufficiently, attributable, expire, offended, adversely, occurring, incredibly, exist, revitalize, accelerate, exempt, stems, neutral, compromised, expressly, therein, rational, complementary, boring, rhetorical, amounted, genuinely, burning, vague, existential, spying, intentionally, proletarian, applicable, marital, depressive, authentic, ate, denies, creed, objective, horrible, disruptive, reproduce, superficial, alive, productive

## 7. Query matches – per topic

A table of all topics used as development and test sets along with their respective query matches.

| Topic                                     | Main Concept                              | Motion Set  | #MC Matches | #that-MC Matches | #that-MC-CL |
|-------------------------------------------|-------------------------------------------|-------------|-------------|------------------|-------------|
| Video game controversies                  | Video game controversies                  | Development | 1113        | 143              | 28          |
| Doping in sport                           | Doping in sport                           | Development | 5560        | 925              | 140         |
| Boxing                                    | Boxing                                    | Development | 74959       | 3810             | 301         |
| Freedom of speech                         | Freedom of speech                         | Development | 36818       | 6087             | 1318        |
| Intellectual property                     | Intellectual property                     | Development | 14147       | 1607             | 255         |
| Endangered species                        | Endangered species                        | Development | 16669       | 1142             | 94          |
| Gaza War (2008,??09)                      | Gaza War (2008,??09)                      | Development | 1041        | 131              | 8           |
| Tower block                               | Tower block                               | Development | 9635        | 422              | 35          |
| Blasphemy                                 | Blasphemy                                 | Development | 2985        | 532              | 109         |
| Holocaust denial                          | Holocaust denial                          | Development | 1851        | 321              | 81          |
| Private university                        | Private university                        | Development | 4025        | 153              | 14          |
| Association of Southeast Asian Nations    | Association of Southeast Asian Nations    | Development | 2364        | 171              | 33          |
| Free market                               | Free market                               | Development | 4826        | 964              | 215         |
| Child actor                               | Child actor                               | Development | 1958        | 66               | 5           |
| Religion                                  | Religion                                  | Development | 166379      | 23028            | 4388        |
| Plastic surgery                           | Plastic surgery                           | Development | 4983        | 504              | 71          |
| Same-sex marriage                         | Same-sex marriage                         | Development | 102199      | 11244            | 2151        |
| Reality television                        | Reality television                        | Development | 19703       | 1139             | 111         |
| Internet censorship                       | Internet censorship                       | Development | 3245        | 523              | 57          |
| Socialism                                 | Socialism                                 | Development | 29785       | 3650             | 763         |
| Beauty pageant                            | Beauty pageant                            | Development | 12162       | 416              | 84          |
| Vegetarianism                             | Vegetarianism                             | Development | 6101        | 640              | 95          |
| Libertarianism                            | Libertarianism                            | Development | 4919        | 529              | 107         |
| Internet                                  | Internet                                  | Development | 108302      | 11635            | 1672        |
| Science                                   | Science                                   | Development | 164299      | 15408            | 3200        |
| Suicide                                   | Suicide                                   | Development | 46658       | 8235             | 1285        |
| Nationalism                               | Nationalism                               | Development | 76324       | 7552             | 1087        |
| Atomic bombings of Hiroshima and Nagasaki | Atomic bombings of Hiroshima and Nagasaki | Development | 11441       | 1075             | 130         |
| Television                                | Television                                | Development | 147875      | 9039             | 929         |
| Casino                                    | Casino                                    | Development | 14582       | 1125             | 134         |
| Age of consent                            | Age of consent                            | Development | 2088        | 282              | 74          |
| Higher education                          | Higher education                          | Development | 60811       | 5753             | 880         |
| Organic food                              | Organic food                              | Development | 2133        | 216              | 41          |
| Standardized test                         | Standardized test                         | Development | 2460        | 274              | 48          |
| Urbanization                              | Urbanization                              | Development | 14009       | 1079             | 145         |
| Extreme sport                             | Extreme sport                             | Development | 1390        | 70               | 7           |
| Direct democracy                          | Direct democracy                          | Development | 10902       | 1631             | 448         |
| Instant-runoff voting                     | Instant-runoff voting                     | Development | 1564        | 142              | 24          |
| Lottery                                   | Lottery                                   | Development | 6124        | 564              | 77          |
| Homeschooling                             | Homeschooling                             | Development | 7222        | 653              | 76          |
| Guantanamo Bay detention camp             | Guantanamo Bay detention camp             | Development | 3565        | 743              | 215         |
| Insanity defense                          | Insanity defense                          | Development | 1770        | 394              | 91          |
| Newspaper                                 | Newspaper                                 | Development | 107511      | 5297             | 506         |
| Illegal immigration                       | Illegal immigration                       | Development | 8090        | 1712             | 287         |
| Renewable energy                          | Renewable energy                          | Development | 10677       | 1248             | 163         |
| Coral reef                                | Coral reef                                | Development | 7241        | 486              | 67          |
| Daylight saving time                      | Daylight saving time                      | Development | 812         | 78               | 11          |
| NASA                                      | NASA                                      | Development | 21686       | 1299             | 196         |
| Geothermal energy                         | Geothermal energy                         | Development | 1199        | 96               | 11          |
| Generic drug                              | Generic drug                              | Development | 1419        | 138              | 29          |

|                                   |                                   |             |       |      |      |
|-----------------------------------|-----------------------------------|-------------|-------|------|------|
| Electoral College (United States) | Electoral College (United States) | Development | 7713  | 501  | 63   |
| Nuclear weapon                    | Nuclear weapon                    | Development | 55722 | 8368 | 1636 |
| Hacker (computer security)        | Hacker (computer security)        | Development | 11863 | 1747 | 326  |
| Speed limit                       | Speed limit                       | Development | 5407  | 427  | 75   |
| Randomized controlled trial       | Randomized controlled trial       | Development | 3874  | 405  | 101  |
| Global warming                    | Global warming                    | Development | 9024  | 2146 | 583  |
| Assisted suicide                  | Assisted suicide                  | Development | 1743  | 263  | 50   |
| Anarchism                         | Anarchism                         | Development | 14034 | 1505 | 314  |
| United Nations                    | United Nations                    | Development | 56321 | 5336 | 828  |
| Public broadcasting               | Public broadcasting               | Development | 10734 | 649  | 70   |
| Trade union                       | Trade union                       | Development | 89956 | 7796 | 1308 |
| Hate speech                       | Hate speech                       | Development | 3889  | 914  | 172  |
| Energy development                | Energy development                | Development | 5360  | 640  | 103  |
| Quebec sovereignty movement       | Quebec sovereignty movement       | Development | 1258  | 215  | 44   |
| Child labour                      | Child labour                      | Development | 12306 | 1381 | 241  |
| Pride parade                      | Pride parade                      | Development | 2202  | 177  | 34   |
| Parental leave                    | Parental leave                    | Development | 1814  | 167  | 15   |
| Tabloid journalism                | Tabloid journalism                | Development | 2500  | 217  | 43   |
| UNESCO                            | UNESCO                            | Development | 10012 | 370  | 25   |
| Paralympic Games                  | Paralympic Games                  | Development | 4474  | 201  | 8    |
| National Rifle Association        | National Rifle Association        | Development | 2039  | 134  | 20   |
| Chain store                       | Chain store                       | Development | 10004 | 546  | 27   |
| Habitat for Humanity              | Habitat for Humanity              | Development | 1067  | 39   | 3    |
| Public art                        | Public art                        | Development | 3318  | 134  | 8    |
| IKEA                              | IKEA                              | Development | 1004  | 72   | 5    |
| Online advertising                | Online advertising                | Development | 2052  | 207  | 20   |
| Mixed-use development             | Mixed-use development             | Development | 4227  | 202  | 16   |
| Second Life                       | Second Life                       | Development | 1526  | 157  | 17   |
| Greyhound racing                  | Greyhound racing                  | Development | 1568  | 80   | 3    |
| Israeli disengagement from Gaza   | Israeli disengagement from Gaza   | Development | 2121  | 272  | 32   |
| Single parent                     | Single parent                     | Development | 4031  | 288  | 50   |
| Private military company          | Private military company          | Development | 731   | 86   | 13   |
| Coaching                          | Coaching                          | Development | 4285  | 249  | 26   |
| Economic sanctions                | Economic sanctions                | Development | 1676  | 240  | 51   |
| Diaper                            | Diaper                            | Development | 1364  | 160  | 23   |
| PayPal                            | PayPal                            | Development | 1143  | 109  | 11   |
| Internet Archive                  | Internet Archive                  | Development | 1204  | 42   | 5    |
| Vietnam War                       | Vietnam War                       | Development | 34132 | 2936 | 364  |
| 2003 invasion of Iraq             | 2003 invasion of Iraq             | Development | 10139 | 1432 | 218  |
| Virtual reality                   | Virtual reality                   | Development | 7789  | 763  | 111  |
| HTTP cookie                       | HTTP cookie                       | Development | 1027  | 144  | 30   |
| Animal slaughter                  | Animal slaughter                  | Development | 1522  | 210  | 42   |
| Magnet school                     | Magnet school                     | Development | 2808  | 122  | 12   |
| Strike action                     | Strike action                     | Development | 35957 | 3808 | 595  |
| Corporate tax                     | Corporate tax                     | Development | 1472  | 203  | 32   |
| Student loan                      | Student loan                      | Development | 1250  | 146  | 22   |
| YouTube                           | YouTube                           | Development | 28527 | 1591 | 132  |
| Division of labour                | Division of labour                | Development | 9546  | 897  | 162  |
| Ecotourism                        | Ecotourism                        | Development | 2376  | 142  | 16   |
| Academic freedom                  | Academic freedom                  | Development | 1013  | 203  | 45   |

|                                                         |                                                |      |        |       |      |
|---------------------------------------------------------|------------------------------------------------|------|--------|-------|------|
| Affirmative action brings more good than harm           | Affirmative action                             | Test | 1559   | 306   | 79   |
| We should ban gambling                                  | Gambling                                       | Test | 22048  | 2972  | 541  |
| We should abolish the monarchy                          | Monarchy                                       | Test | 39611  | 4156  | 684  |
| Atheism is the only way                                 | Atheism                                        | Test | 7556   | 1227  | 299  |
| We should further exploit wind power                    | Wind power                                     | Test | 4786   | 466   | 87   |
| We should legalize polygamy                             | Polygamy                                       | Test | 7991   | 876   | 173  |
| We should further exploit hydroelectric dams            | Hydroelectricity                               | Test | 11843  | 801   | 93   |
| We should privatize water supply                        | Water supply                                   | Test | 12171  | 1062  | 168  |
| We should legalize prostitution                         | Prostitution                                   | Test | 29121  | 4066  | 792  |
| Zoos bring more harm than good                          | Zoo                                            | Test | 10579  | 654   | 73   |
| Private education brings more good than harm            | Private school                                 | Test | 12237  | 604   | 71   |
| Recall elections are beneficial                         | Recall election                                | Test | 1813   | 182   | 33   |
| We should further exploit nuclear power                 | Nuclear power                                  | Test | 8251   | 1273  | 319  |
| We should abolish temporary employment                  | Temporary work                                 | Test | 1533   | 180   | 38   |
| Surrogacy should be banned                              | Surrogacy                                      | Test | 1340   | 164   | 47   |
| Progressive tax is beneficial                           | Progressive tax                                | Test | 1073   | 141   | 44   |
| We should ban alcoholic beverages                       | Alcoholic beverage                             | Test | 13458  | 2022  | 499  |
| We should ban abortions                                 | Abortion                                       | Test | 14438  | 3800  | 1091 |
| Astrology brings more harm than good                    | Astrology                                      | Test | 4756   | 677   | 159  |
| Embryonic stem cell research brings more good than harm | Embryonic stem cell                            | Test | 1194   | 183   | 31   |
| We should abolish the Olympic Games                     | Olympic Games                                  | Test | 25977  | 1215  | 77   |
| We should end athletic scholarships                     | Athletic scholarship                           | Test | 2473   | 111   | 8    |
| Social media does more harm than good                   | Social media                                   | Test | 7423   | 901   | 124  |
| We should disband the United Nations Security Council   | United Nations Security Council                | Test | 10457  | 1035  | 289  |
| Manned spaceflights bring more good than harm           | Human spaceflight                              | Test | 6885   | 545   | 106  |
| Extra-curricular activity is beneficial                 | Extracurricular activity                       | Test | 3909   | 205   | 5    |
| We should legalize insider trading                      | Insider trading                                | Test | 1104   | 241   | 50   |
| We should prohibit hydraulic fracturing                 | Hydraulic fracturing                           | Test | 1836   | 277   | 75   |
| We should prohibit corporal punishment                  | Corporal punishment                            | Test | 2758   | 469   | 124  |
| Homework does more harm than good                       | Homework                                       | Test | 989    | 110   | 15   |
| We should disband NATO                                  | NATO                                           | Test | 11324  | 1274  | 286  |
| We should abolish the two-party system                  | Two-party system                               | Test | 2258   | 316   | 46   |
| Capital punishment brings more harm than good           | Capital punishment                             | Test | 131080 | 15773 | 2339 |
| We should abolish term limits                           | Term limit                                     | Test | 3889   | 508   | 95   |
| We should protect whistleblowers                        | Whistleblower                                  | Test | 2265   | 354   | 85   |
| Twitter brings more harm than good                      | Twitter                                        | Test | 14668  | 1487  | 199  |
| ISO brings more harm than good                          | International Organization for Standardization | Test | 3970   | 381   | 52   |
| Conscientious objectors are justified                   | Conscientious objector                         | Test | 1655   | 176   | 41   |
| The American Bar Association brings more harm than good | American Bar Association                       | Test | 1887   | 112   | 27   |
| Digital rights management brings more harm than good    | Digital rights management                      | Test | 2571   | 486   | 112  |
| We should ban the Church of Scientology                 | Church of Scientology                          | Test | 1410   | 222   | 46   |
| eBay brings more good than harm                         | EBay                                           | Test | 7997   | 606   | 65   |
| We should abolish the caste system in India             | Caste system in India                          | Test | 1199   | 151   | 20   |
| We should abolish infant baptism                        | Infant baptism                                 | Test | 835    | 134   | 45   |
| EHRs bring more harm than good                          | Electronic health record                       | Test | 1054   | 135   | 16   |
| Wildlife management brings more good than harm          | Wildlife management                            | Test | 1734   | 172   | 17   |
| We should tax plastic bags                              | Plastic bag                                    | Test | 1490   | 119   | 27   |
| The energy industry should be nationalized              | Energy industry                                | Test | 1823   | 137   | 20   |
| We should adopt economic regionalisation                | Protectionism                                  | Test | 10314  | 2213  | 402  |
| We should limit genetic testing                         | Genetic testing                                | Test | 2578   | 403   | 119  |
